# Supplementary material for: A reversible fluorescent-colorimetric chemosensor based on a novel Schiff base for visual detection of CO32− in aqueous solution
Source: Royal Society of Chemistry journal article supplement (doi:10.1039/c5ra24549d), 2016-01-01
Supplement: c5ra24549d1.pdf [file c5ra24549d1.pdf]

## Supplementary documents

### **A reversible fluorescent-colorimetric chemosensor based on a novel Schiff base for visual detection of $\text{CO}_3^{2-}$ in aqueous solution**

**Anupam Ghorai, Jahangir Mondal, Rukmani Chandra and Goutam K Patra\***

**Department of Chemistry, Guru Ghasidas Vishwavidyalaya, Bilaspur (C.G)**

#### Table of contents

1.  $^1\text{H}$  NMR spectra of L.
2.  $^{13}\text{C}$  NMR Spectra of L.
3. FTIR spectra of L.
4. Mass spectra of L.
5. Changes in the absorption spectra of L (10 mM) in the presence of 2 eq. of different cations.
6. Changes in absorption spectra of L (10 $\mu\text{M}$ ) in presence of 2 equiv. of  $\text{CO}_3^{2-}$  (Red trace);  $\text{CN}^-$  (pink trace) and  $\text{S}^{2-}$ (green trace). Only L (black trace) and L in presence of  $\text{S}^{2-}$  at high concentration  $8 \times 10^{-3}$  M (blue trace).
7. The colour change of L (10  $\mu\text{M}$ ) upon addition of various anions (2 equiv.) in MeOH– $\text{H}_2\text{O}$  (2: 1, v/v) at room temperature.
8. UV-Vis spectra of L in different solvents.
9. Absorbance spectra of L (10 mM), L +  $\text{CO}_3^{2-}$ (2 equiv.) and L+  $\text{OH}^-$  (2 equiv.)
10. Ratiometric response of L vs. the number of equiv. of  $\text{CO}_3^{2-}$  added.
11. Job plot for  $\text{CO}_3^{2-}$ .
12. UV-Vis spectra of L (red line), L+ $\text{Na}_2\text{CO}_3$  (blue line) and L+ $\text{K}_2\text{CO}_3$  (black line).
13. Detection limit.
14. FTIR spectra of L+  $\text{Na}_2\text{CO}_3$ .
15.  $^1\text{H}$  NMR spectra of L and L +  $\text{Na}_2\text{CO}_3$  in  $d_6$ -DMSO- $\text{D}_2\text{O}$  (9/1, v/v).
16. HRMS spectra of L +  $\text{Na}_2\text{CO}_3$ .
17. Fluorescence intensity of L before and after addition of carbonate ion (2 equiv.) in various pH medium.
18. (a) SEM image of L (b) SEM image of L +  $\text{Na}_2\text{CO}_3$ .
19. Time evolution for carbonate ion.
20. Change in fluorescence of L on addition of carbonate ion in different water samples.

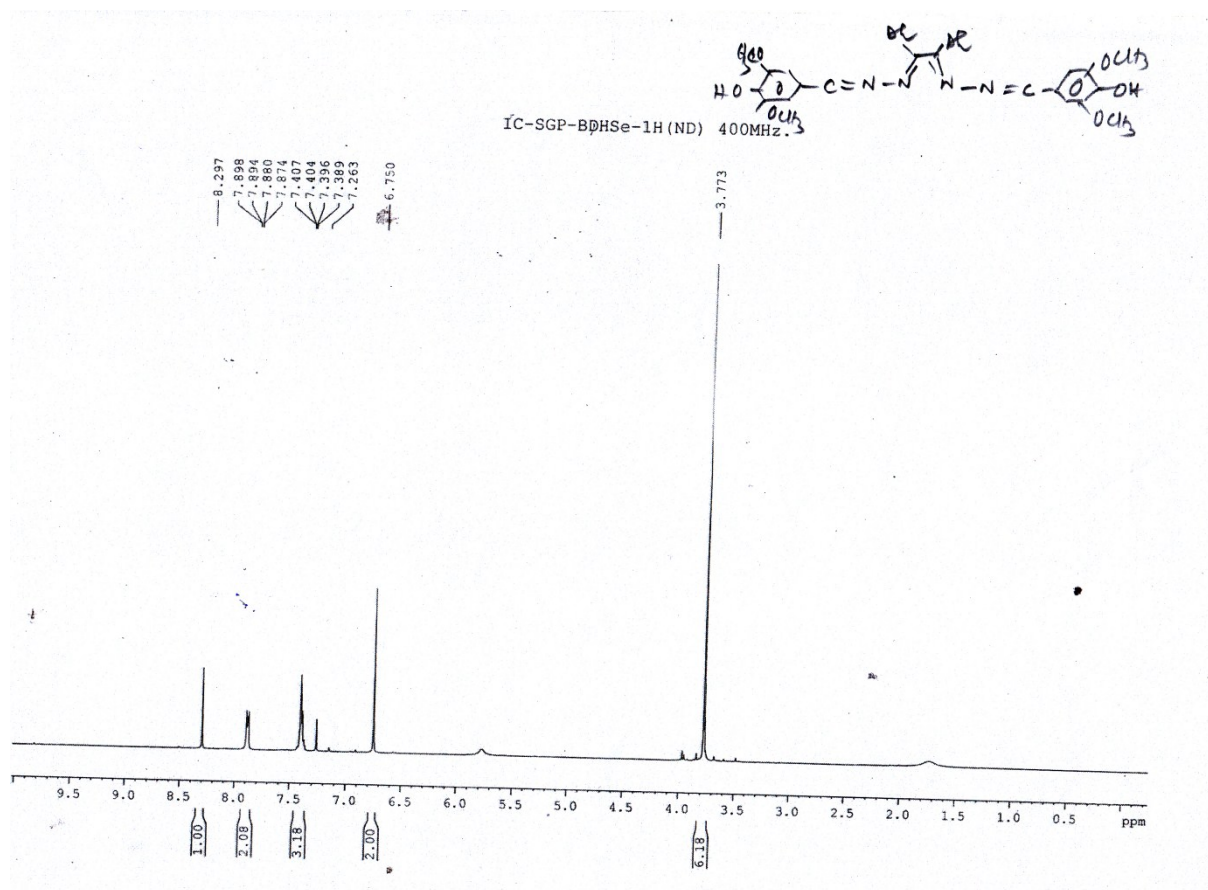

**Fig. S1**  $^1\text{H}$  NMR spectra of **L** in  $\text{CDCl}_3$ .

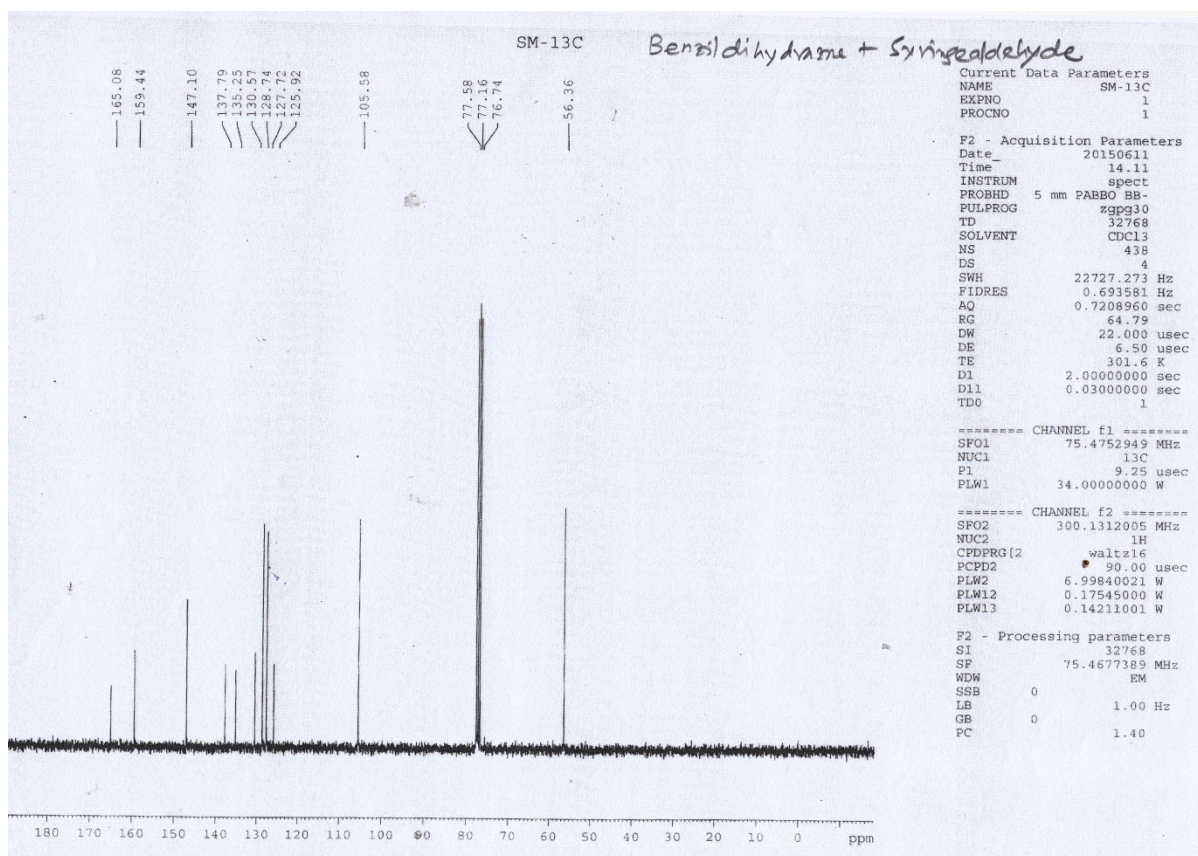

Fig. S2  $^{13}\text{C}$  NMR Spectra of L in  $\text{CDCl}_3$ .

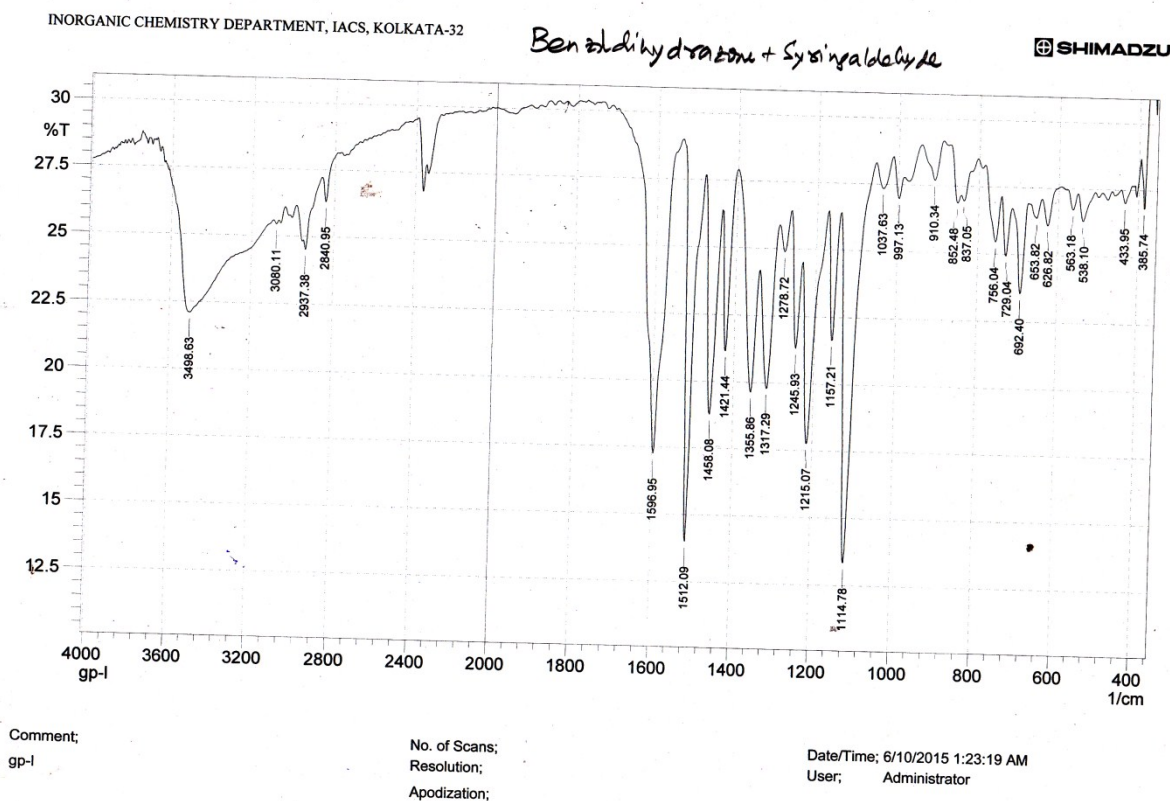

Fig. S3 FTIR spectra of L.

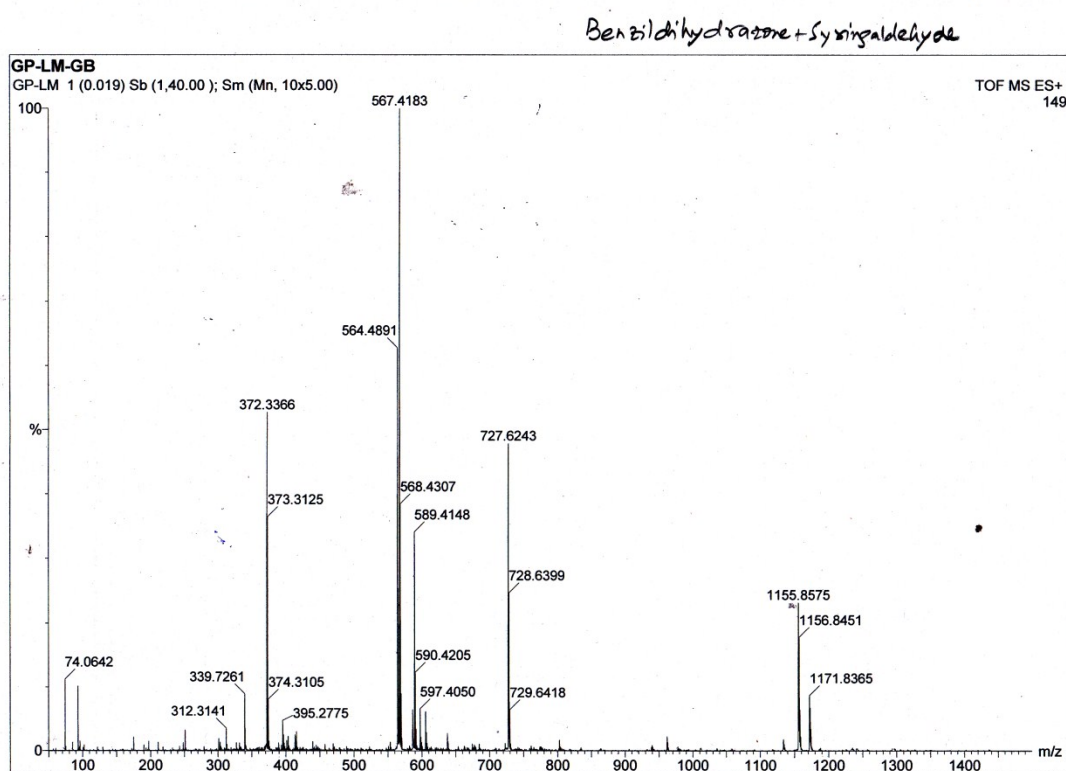

Fig. S4 Mass spectra of L.

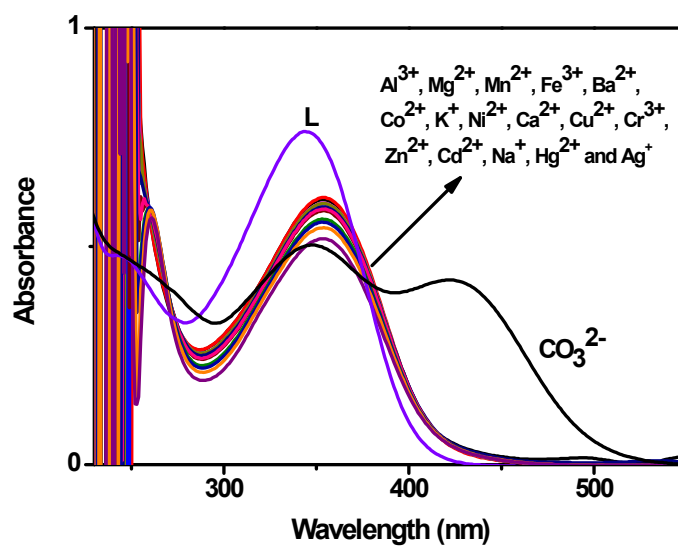

Fig. S5 Changes in the absorption spectra of L (10  $\mu\text{M}$ ) in the presence of 2 eq. of different cations.

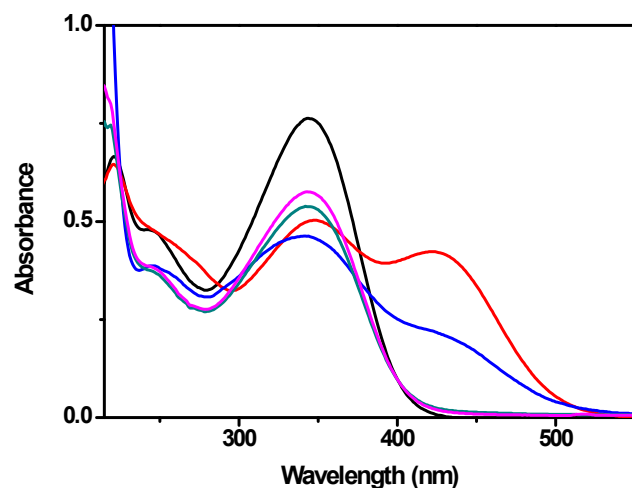

**Fig. S6** Changes in absorption spectra of L (10  $\mu$ M) in presence of 2 equiv. of  $\text{CO}_3^{2-}$  (Red trace);  $\text{CN}^-$  (pink trace) and  $\text{S}^{2-}$  (green trace). Only L (black trace) and L in presence of  $\text{S}^{2-}$  at high concentration  $8 \times 10^{-3}$  M (blue trace).

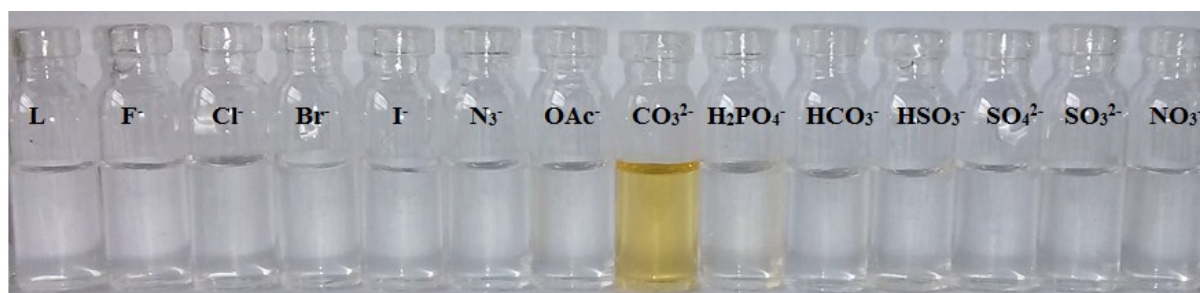

**Fig. S7** The colour change of L (10  $\mu$ M) upon addition of various anions (2 equiv.) in MeOH–H<sub>2</sub>O (2: 1, v/v) at room temperature.

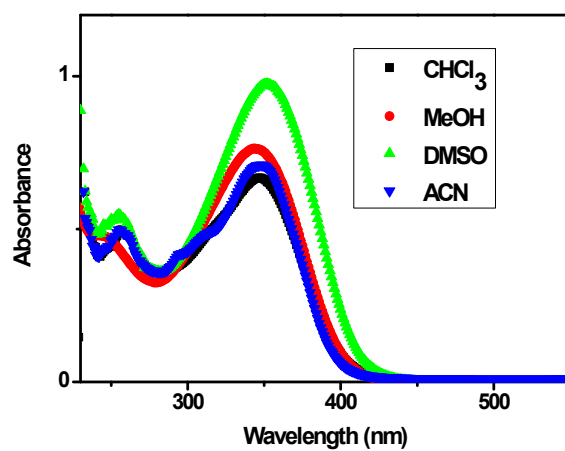

**Fig. S8** UV-Vis spectra of L in different solvents.



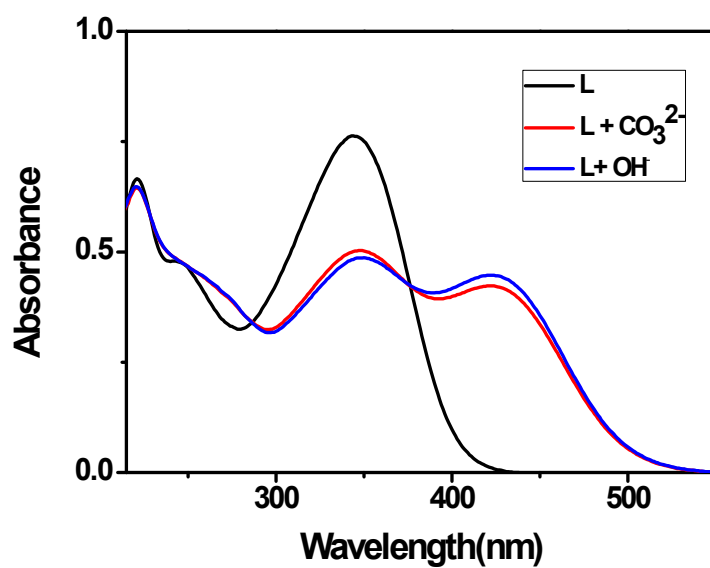

Fig. S9 Absorbance spectra of L (10 mM), L + CO<sub>3</sub><sup>2-</sup> (2 equiv.) and L + OH<sup>-</sup> (2 equiv.)

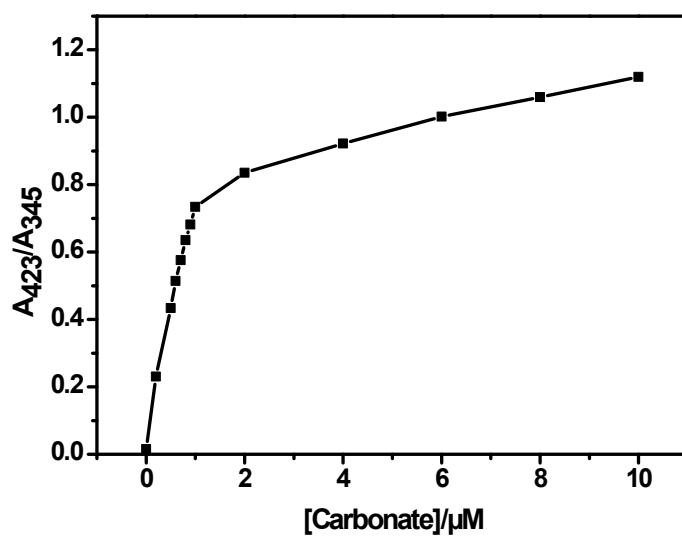

Fig. S10 Ratiometric response of L vs. the number of equiv. of CO<sub>3</sub><sup>2-</sup> added.

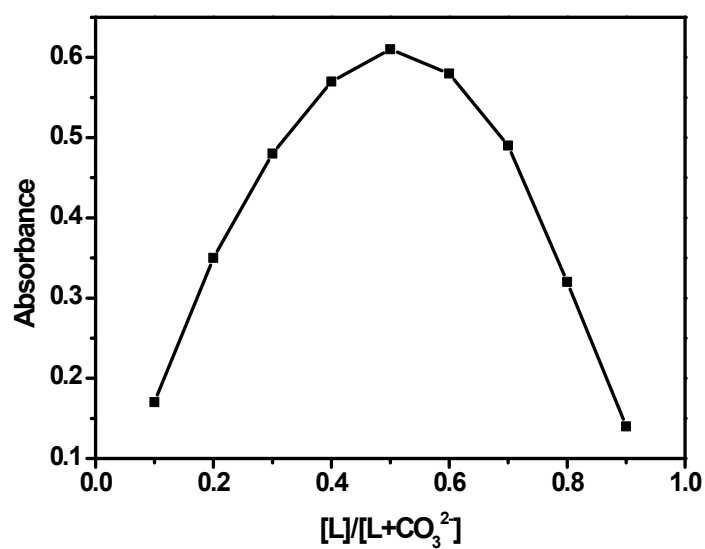

Fig. S11 Job plot for  $\text{CO}_3^{2-}$ .

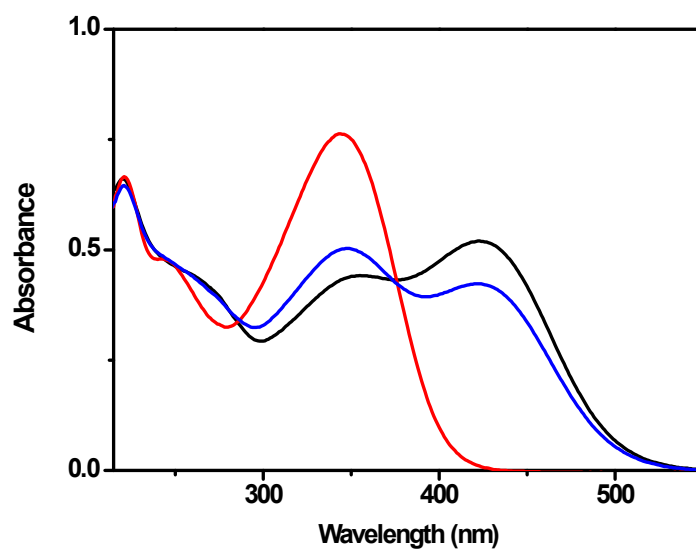

Fig. S12 UV-Vis spectra of L (red line), L+ $\text{Na}_2\text{CO}_3$  (blue line) and L+ $\text{K}_2\text{CO}_3$  (black line).

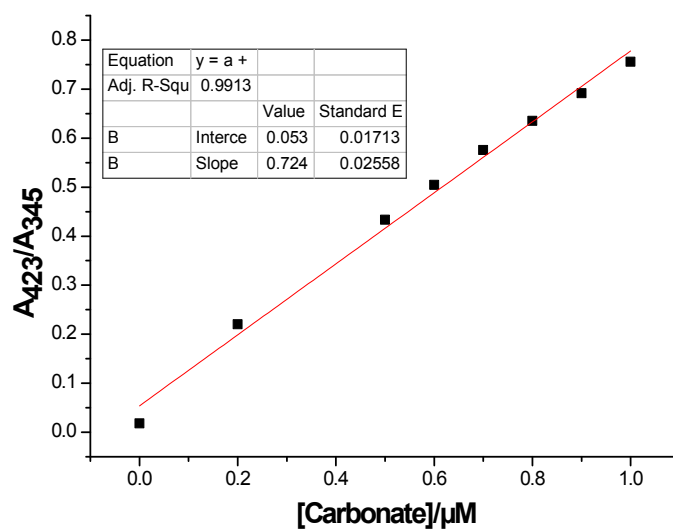

Fig. S13 Detection limit.

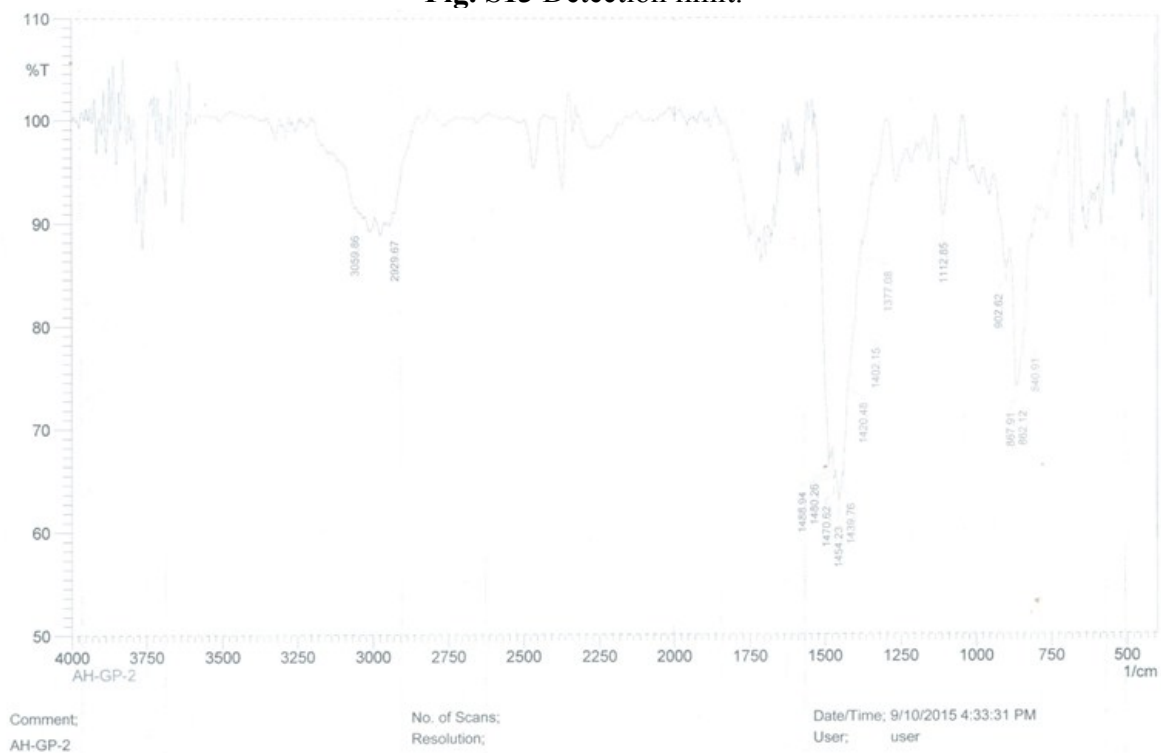

Fig. S14 FTIR spectra of L+ Na<sub>2</sub>CO<sub>3</sub>.



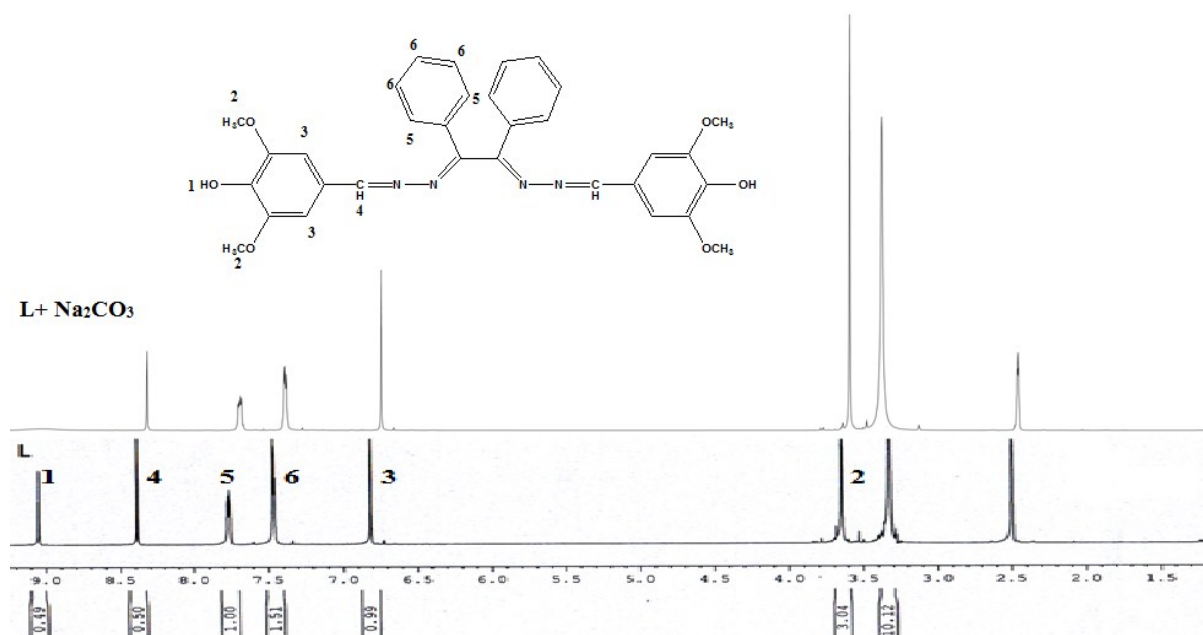

**Fig. S15**  $^1\text{H}$  NMR spectra of L and L +  $\text{Na}_2\text{CO}_3$  in  $d_6$ -DMSO- $\text{D}_2\text{O}$  (9/1, v/v).

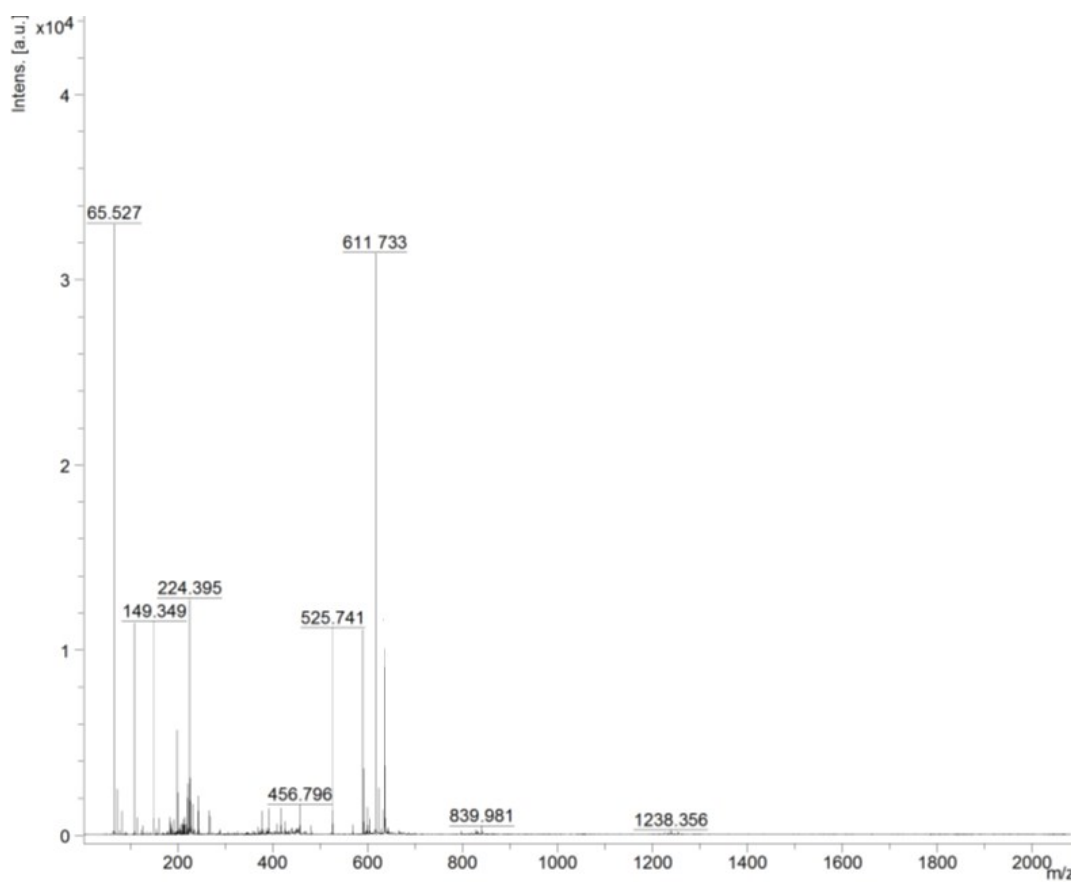

**Fig. S16** HRMS spectra of L +  $\text{Na}_2\text{CO}_3$ .

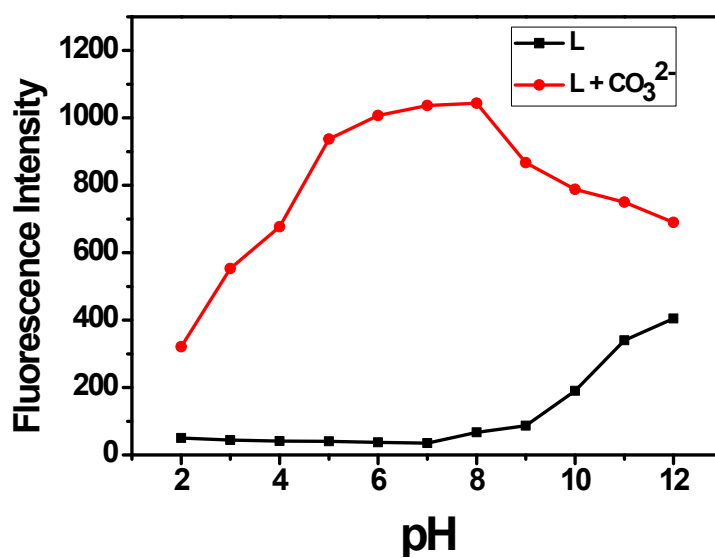

**Fig. S17** Fluorescence intensity of **L** before and after addition of carbonate ion (2 equiv.) in various pH medium.

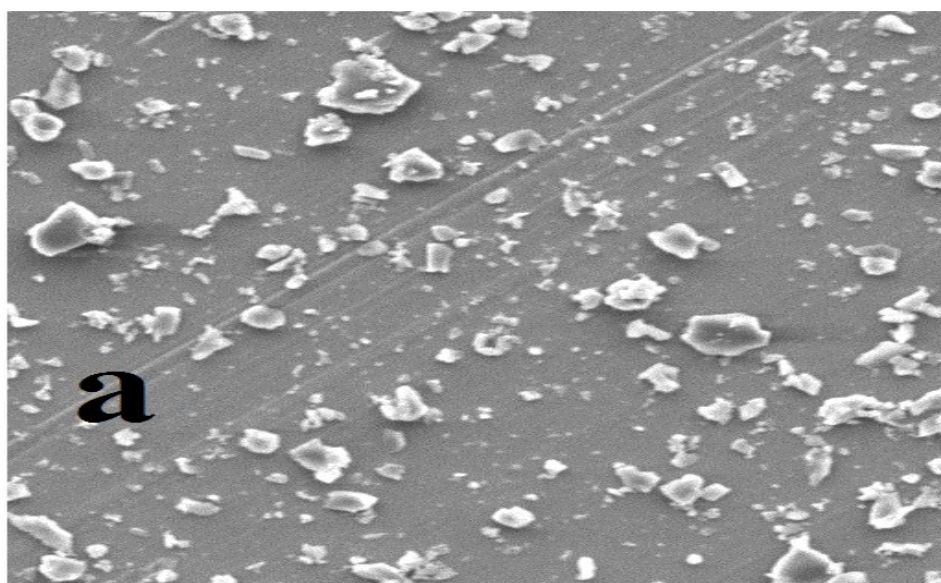

SEM HV: 10.00 kV  
SEM MAG: 1.51 kx  
PC: 9

WD: 27.6040 mm  
Det: SE Detector  
Vac: HiVac

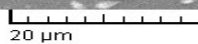

VEGA\\ TESCAN  
IIT, Kharagpur  
Materials Science

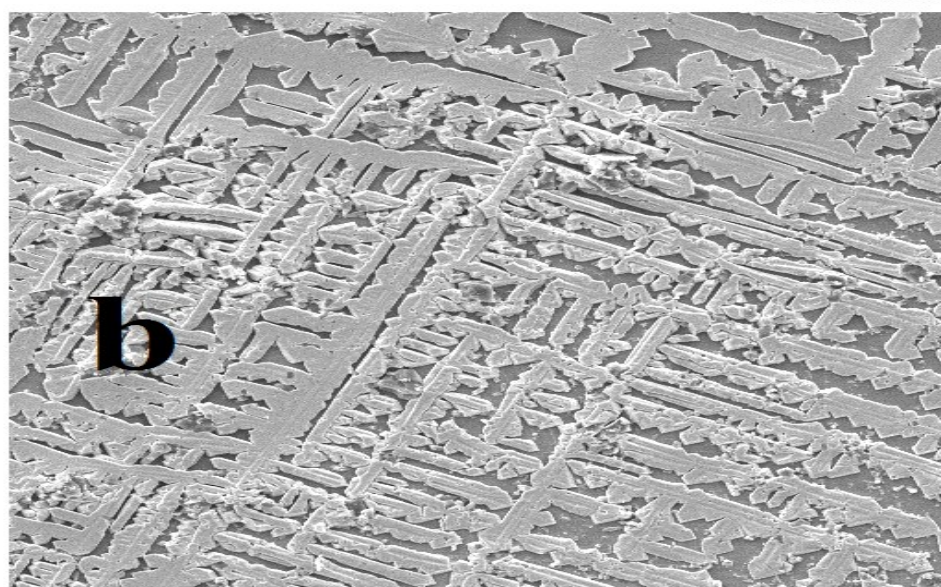

SEM HV: 10.00 kV  
SEM MAG: 700 x  
PC: 9

WD: 27.6340 mm  
Det: SE Detector  
Vac: HiVac

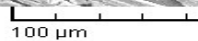

VEGA\\ TESCAN  
IIT, Kharagpur  
Materials Science

**Fig. S18** (a) SEM image of L (b) SEM image of L +  $\text{Na}_2\text{CO}_3$ .

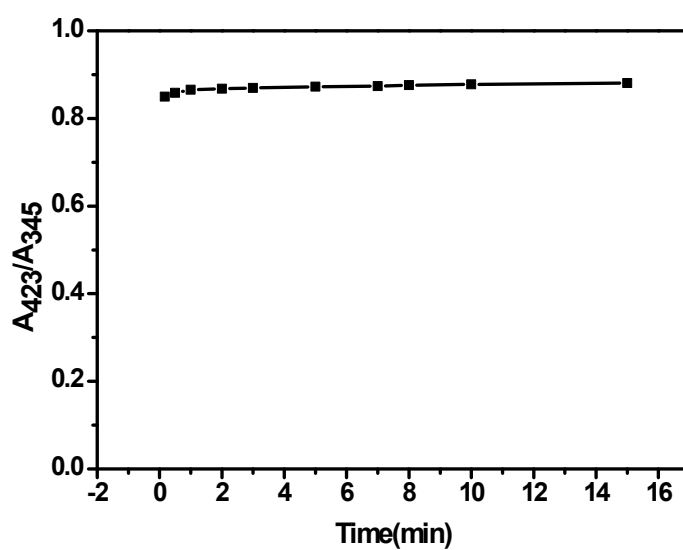

Fig. S19 Time evolution for carbonate ion.

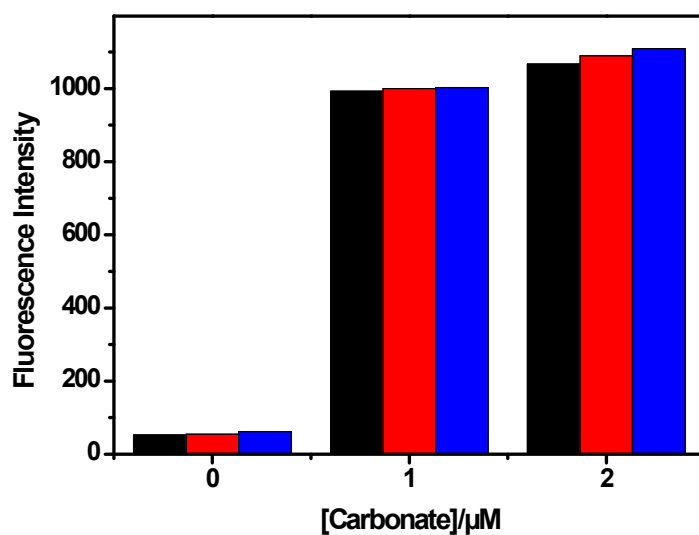

Fig. S20 Change in fluorescence intensity of L on addition of carbonate ion in different water samples.
